# Supplementary material
Source: PubMed Central journal article supplement (PMC3427121)
Supplement: 1211144109_pnas.201211144SI.pdf [file 1211144109_pnas.201211144SI.pdf]

# Supporting Information

Jain et al. 10.1073/pnas.1211144109

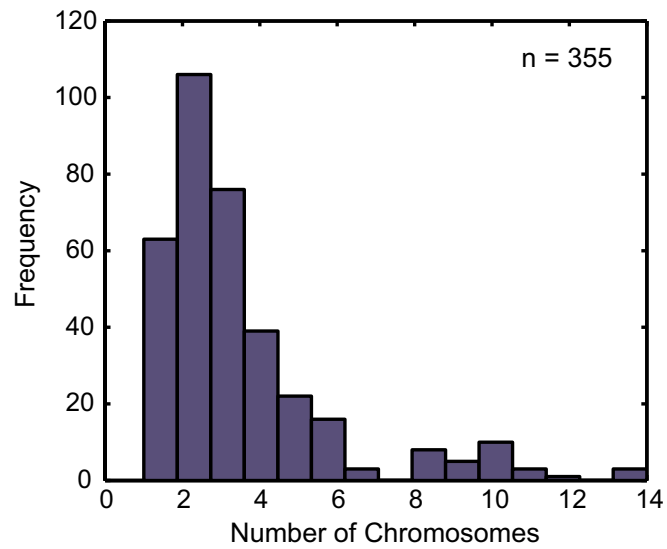

Fig. S1. Histogram of the number of chromosomes per cell in an exponentially growing wild-type population.





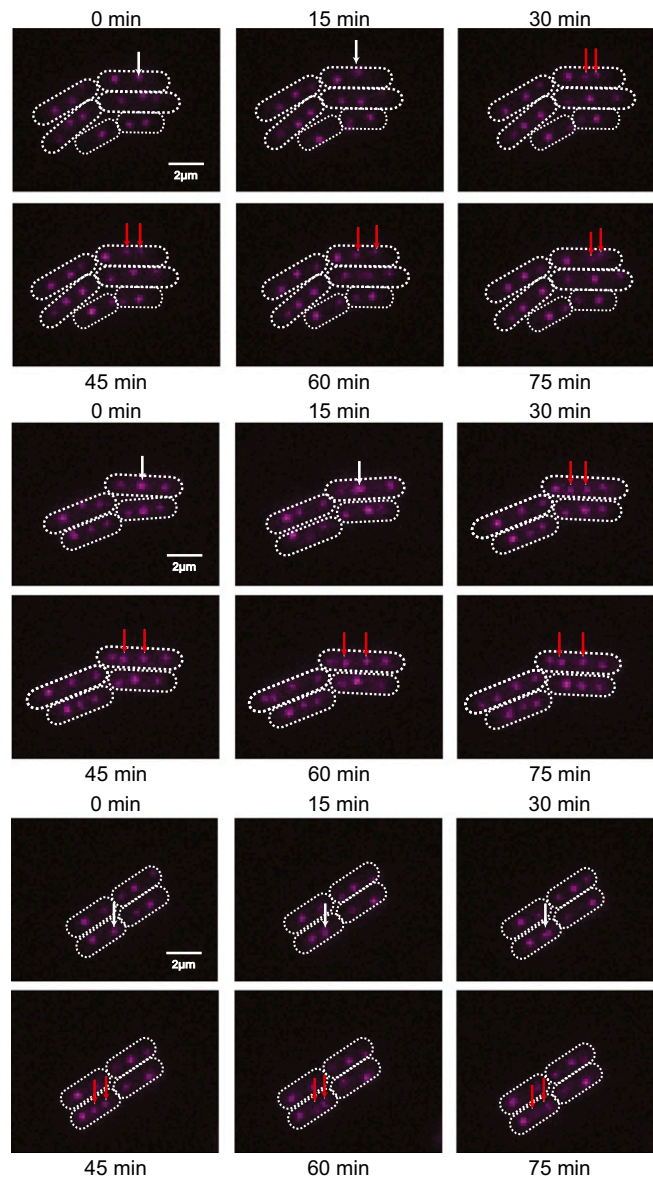

**Fig. S4.** Three time courses of wild-type cells. A single genomic locus proximal to the origin is labeled by using *tet* operator arrays (pink dots). White arrows point to a replicating chromosome and red arrows point to the resulting, replicated chromosomes. A single z-section is shown for each time course.

**Table S1. Table of plasmids**

| Plasmid | Description                                                                                                       | Resistance | Source    |
|---------|-------------------------------------------------------------------------------------------------------------------|------------|-----------|
| pAM1303 | Neutral site 1 integration vector                                                                                 | Sp/Sm      | (1)       |
| pAM1579 | Neutral site 2.1 integration vector                                                                               | Kan (Amp)  | (1)       |
| pAM1573 | Neutral site 2.1 integration vector                                                                               | Cm (Amp)   | (1)       |
| EB2065  | Neutral site 2.2 integration vector                                                                               | Cm (Amp)   | This work |
| EB2066  | Site A integration vector (between chromosomal position 1595934 and 1595935 relative to GenBank CP000100)         | Cm (Amp)   | This work |
| EB2067  | Site B integration vector (between chromosomal position 1758400 and 1758401 relative to GenBank CP000100)         | Cm (Amp)   | This work |
| eBB110  | Source of 120 Tet operator repeats                                                                                | Amp        | (2)       |
| pLAU43  | Source of 120 Lac operator repeats                                                                                | Amp        | (3)       |
| EB2068  | 120 Tet operators PCRed using primers pBBSall and pBBXbal from eBB110 cloned between Sall and Xbal of pAM1579     | Kan (Amp)  | This work |
| EB2069  | 120 Lac operators from Xbal, SmaI fragment of pLAU43 cloned between Xbal and SmaI of pAM1573                      | Cm (Amp)   | This work |
| EB2070  | 120 Lac operators from SmaI, Sall fragment of pLAU43 cloned between SmaI and XhoI of EB2066                       | Cm (Amp)   | This work |
| EB2071  | 120 Lac operators from SmaI, Sall fragment of pLAU43 cloned between SmaI and XhoI of EB2067                       | Cm (Amp)   | This work |
| pJRC23  | Source of ECFP                                                                                                    | Sp/Sm      | (4)       |
| EB2072  | <i>PkaiBC::tetR::ECFP PkaiBC::EYFP::lacI</i> cloned between NotI and SacI of pAM1303                              | Sp/Sm      | This work |
| EB2073  | <i>PkaiBC::tetR::EYFP</i> cloned between NotI and SacI of pAM1303                                                 | Sp/Sm      | This work |
| EB2074  | <i>PapA::rbcl::ECFP</i> cloned between SmaI and XhoI of EB2065                                                    | Cm (Amp)   | This work |
| pAM2055 | Source of gentamycin cassette for deletion vectors                                                                | Gm (Amp)   | (1)       |
| EB2075  | <i>mreB (Synpcc7942_0300)</i> deletion vector with gentamycin cassette inserted between BamHI and SacI of pUC18   | Gm (Amp)   | This work |
| EB2076  | <i>ftsZ (Synpcc7942_2378)</i> deletion vector with gentamycin cassette inserted between HindIII and SacI of pUC18 | Gm (Amp)   | This work |
| EB2077  | <i>parA1 (Synpcc7942_0220)</i> deletion vector with gentamycin cassette inserted between BamHI and SacI of pUC18  | Gm (Amp)   | This work |
| EB2078  | <i>minD (Synpcc7942_0896)</i> deletion vector with gentamycin cassette inserted between BamHI and SacI of pUC18   | Gm (Amp)   | This work |
| EB2079  | <i>parA2 (Synpcc7942_1833)</i> deletion vector with gentamycin cassette inserted between BamHI and SacI of pUC18  | Gm (Amp)   | This work |

Markers shown in parenthesis are additional markers used for selection of plasmids in *E. coli*. Cm, chloramphenicol; Gm, gentamycin; Kan, kanamycin; Sp/Sm, spectinomycin/streptomycin.

1. Mackey SR, Ditty JL, Clerico EM, Golden SS (2007) Detection of rhythmic bioluminescence from luciferase reporters in cyanobacteria. *Methods Mol Biol* 362:115–129.
2. Marquis KA, et al. (2008) SpoIIIE strips proteins off the DNA during chromosome translocation. *Genes Dev* 22:1786–1795.
3. Lau IF, et al. (2003) Spatial and temporal organization of replicating *Escherichia coli* chromosomes. *Mol Microbiol* 49:731–743.
4. Chabot JR, Pedraza JM, Luitel P, van Oudenaarden A (2007) Stochastic gene expression out-of-steady-state in the cyanobacterial circadian clock. *Nature* 450:1249–1252.

**Table S2. Table of *S. elongatus* strains**

| Strain | Description                                                                                                      | Plasmids used to create this strain from WT | Resistance         | Source    |
|--------|------------------------------------------------------------------------------------------------------------------|---------------------------------------------|--------------------|-----------|
| EOC200 | TetO (NS 2.1)                                                                                                    | EB2068                                      | Kan                | This work |
| EOC201 | TetO (NS 2.1), LacO (A)                                                                                          | EB2068, EB2070                              | Kan, Cm            | This work |
| EOC202 | TetO (NS 2.1), LacO (B)                                                                                          | EB2068, EB2071                              | Kan, Cm            | This work |
| EOC203 | TetO (NS 2.1), <i>tetR::EYFP</i> (NS 1)                                                                          | EB2068, EB2073                              | Kan, Sp/Sm         | This work |
| EOC204 | TetO (NS 2.1), LacO (A), <i>tetR::ECFP EYFP::lacI</i> (NS 1)                                                     | EB2068, EB2070, EB2072                      | Kan, Cm, Sp/Sm     | This work |
| EOC205 | TetO (NS 2.1), LacO (B), <i>tetR::ECFP EYFP::lacI</i> (NS 1)                                                     | EB2068, EB2071, EB2072                      | Kan, Cm, Sp/Sm     | This work |
| EOC206 | TetO (NS 2.1), <i>tetR::EYFP</i> (NS 1), <i>rbcl::ECFP</i> (NS 2.2)                                              | EB2068, EB2073, EB2074                      | Kan, Cm, Sp/Sm     | This work |
| EOC207 | $\Delta$ <i>mreB</i> incomplete segregation                                                                      | EB2075                                      | Gm                 | This work |
| EOC208 | $\Delta$ <i>ftsZ</i> incomplete segregation                                                                      | EB2076                                      | Gm                 | This work |
| EOC209 | $\Delta$ <i>parA1</i>                                                                                            | EB2077                                      | Gm                 | This work |
| EOC210 | $\Delta$ <i>minD</i>                                                                                             | EB2078                                      | Gm                 | This work |
| EOC211 | $\Delta$ <i>parA2</i>                                                                                            | EB2079                                      | Gm                 | This work |
| EOC212 | $\Delta$ <i>mreB</i> , TetO (NS 2.1)                                                                             | EB2075, EB2068                              | Gm, Kan            | This work |
| EOC213 | $\Delta$ <i>ftsZ</i> , TetO (NS 2.1)                                                                             | EB2076, EB2068                              | Gm, Kan            | This work |
| EOC214 | $\Delta$ <i>parA1</i> , TetO (NS 2.1)                                                                            | EB2077, EB2068                              | Gm, Kan            | This work |
| EOC215 | $\Delta$ <i>minD</i> , TetO (NS 2.1)                                                                             | EB2078, EB2068                              | Gm, Kan            | This work |
| EOC216 | $\Delta$ <i>parA2</i> , TetO (NS 2.1)                                                                            | EB2079, EB2068                              | Gm, Kan            | This work |
| EOC217 | $\Delta$ <i>mreB</i> incomplete segregation, TetO (NS 2.1), <i>tetR::EYFP</i> (NS 1), <i>rbcl::ECFP</i> (NS 2.2) | EB2075, EB2068, EB2073, EB2074              | Gm, Kan, Sp/Sm, Cm | This work |
| EOC218 | $\Delta$ <i>ftsZ</i> incomplete segregation, TetO (NS 2.1), <i>tetR::EYFP</i> (NS 1), <i>rbcl::ECFP</i> (NS 2.2) | EB2076, EB2068, EB2073, EB2074              | Gm, Kan, Sp/Sm, Cm | This work |
| EOC219 | $\Delta$ <i>parA1</i> , TetO (NS 2.1), <i>tetR::EYFP</i> (NS 1), <i>rbcl::ECFP</i> (NS 2.2)                      | EB2077, EB2068, EB2073, EB2074              | Gm, Kan, Sp/Sm, Cm | This work |
| EOC220 | $\Delta$ <i>minD</i> , TetO (NS 2.1), <i>tetR::EYFP</i> (NS 1), <i>rbcl::ECFP</i> (NS 2.2)                       | EB2078, EB2068, EB2073, EB2074              | Gm, Kan, Sp/Sm, Cm | This work |
| EOC221 | $\Delta$ <i>parA2</i> , TetO (NS 2.1), <i>tetR::EYFP</i> (NS 1), <i>rbcl::ECFP</i> (NS 2.2)                      | EB2079, EB2068, EB2073, EB2074              | Gm, Kan, Sp/Sm, Cm | This work |

**Table S3. Table of primers**

| Primer                                                                                  | Sequence                                                 |
|-----------------------------------------------------------------------------------------|----------------------------------------------------------|
| <b>Primers for site A (EB2066), B (EB2067), and NS 2.2 (EB2065) integration vectors</b> |                                                          |
| MCS_F                                                                                   | 5' GTGCTTCTGGCTATAGCTGACTcgtcacgggtaaccga 3'             |
| MCS_R                                                                                   | 5' ccgcgctggggttaccag 3'                                 |
| A-Up-F                                                                                  | 5' GACCACACCCGTCTGTGGATCCTGCAACTATCCCTCGATC 3'           |
| A-Up-R                                                                                  | 5' AGTCAGCTATAGCCAGAAGCACTGGGAGGCATTAGAAGC 3'            |
| A-Dn-F                                                                                  | 5' ctggtaaccccagcgcggATGCGGATTGAAATTGTTTC 3'             |
| A-Dn-R                                                                                  | 5' TCGTCCGGCGTAGAGGATCCGTTCTCGACCACCCATTTCAG 3'          |
| B-Up-F                                                                                  | 5' GACCACACCCGTCTGTGGATCCGTTTGTGTAGGCCACGAT 3'           |
| B-Up-R                                                                                  | 5' AGTCAGCTATAGCCAGAAGCACTGGGAGGCATTAGAAGC 3'            |
| B-Dn-F                                                                                  | 5' ctggtaaccccagcgcggGACTGTGATGAATTACCTTCAG 3'           |
| B-Dn-R                                                                                  | 5' TCGTCCGGCGTAGAGGATCCAGTAAGCAACGTGGCC 3'               |
| NS22-Up-F                                                                               | 5' GACCACACCCGTCTGTGCAGGCTCAGTGTGGTTCG 3'                |
| NS22-Up-R                                                                               | 5' AGTCAGCTATAGCCAGAAGCAC 3'                             |
| NS22-Dn-F                                                                               | 5' ctggtaaccccagcgcggAGATCTCGCAGCGTAAAGCCGT 3'           |
| NS22-Dn-R                                                                               | 5' TCGTCCGGCGTAGAGGATCCGATCCCATCCACGCAC 3'               |
| <b>Primers for tet operator vector (EB2068)</b>                                         |                                                          |
| pBBSall                                                                                 | 5' TAAACTATGTGACCTTCTTATCTTGATAATAAGGGTAAC 3'            |
| pBBXbal                                                                                 | 5' ATAGTTTATCTAGAccgtccttgaacatgact 3'                   |
| <b>Primers for PapcA::Rbcl::ECFP vector (EB2074)</b>                                    |                                                          |
| Smal_ApcA                                                                               | 5' CATGCCCGGGTACGAGCGCTATATCACCCC 3'                     |
| ApcA_RBS                                                                                | 5' TAATGGATTCCTCCAAGACTAGATTGAAACCAGACTGGCCTCCACC 3'     |
| RBS_Rbcl                                                                                | 5' TCTAGTCTTGGAGGAATCCATTAATGCCCAAGACGCAATCTG 3'         |
| Rbcl_linker                                                                             | 5' ACTAGAACCAGAACTACCAGTACTAGAGGCTTGTCCATCGTTTCGAATTC 3' |
| Linker_ECFP                                                                             | 5' TCTAGTGGTAGTCTTGGTCTAGTATGGTGAAGGCGGAGGAG 3'          |
| ECFP_XhoI                                                                               | 5' CATGCTCGAGTTACTTGTACAGCTCGTCCATGC 3'                  |
| <b>Primers for deletion vectors (EB2075 to EB2079)</b>                                  |                                                          |
| Gent_F                                                                                  | 5' gacgcacaccgtgga 3'                                    |
| Gent_R                                                                                  | 5' gcggcgttgtagcaaa 3'                                   |
| 1833KO-Up-F                                                                             | 5' GATCGATCGGATCCACAAAAAGGGGCTGGTTAG 3'                  |
| 1833KO-Up-R                                                                             | 5' GtttccacggtgtgctcACTAGT CGACAACCTCCCAAAGCG 3'         |
| 1833KO-Dn-F                                                                             | 5' AaattgtcacaacgcgcTGACTGACGCCTTTGACC 3'                |
| 1833KO-Dn-R_Sac                                                                         | 5' GATCGATCGAGTCCAAACAAAATGCCCAAAGT 3'                   |
| 0300KO-Up-F                                                                             | 5' GATCGATCGGATCCGGTAGCCGAATCACTCCGA 3'                  |
| 0300KO-Up-R                                                                             | 5' GtttccacggtgtgctcACTAGTTCGCCTTGATGACGTG 3'            |
| 0300KO-Dn-F                                                                             | 5' AaattgtcacaacgcgcAGCGGTGCGGAGCAG 3'                   |
| 0300KO-Dn-R_Sac                                                                         | 5' GATCGATCGAGCTCAGAGTGTACTAGCGCTAGAAGTG 3'              |
| 0220KO-Up-F                                                                             | 5' GATCGATCGGATCCACCAGATATGCTCGATTGC 3'                  |
| 0220KO-Up-R                                                                             | 5' GtttccacggtgtgctcACTAGTGGTGGATCTCAAGTTCAGGG 3'        |
| 0220KO-Dn-F                                                                             | 5' AaattgtcacaacgcgcCCATGACCCGCAAATCTG 3'                |
| 0220KO-Dn-R_Sac                                                                         | 5' GATCGATCGAGTCCAACTGAGCTTTGGCTTGCT 3'                  |
| 2378KO-Up-F_HindIII                                                                     | 5' GATCGATCAAGCTTAACGGCTGCAGCGCTT 3'                     |
| 2378KO-Up-R                                                                             | 5' GtttccacggtgtgctcACTAGTGGGGTGAGTAGTAGCA 3'            |
| 2378KO-Dn-F                                                                             | 5' AaattgtcacaacgcgcTGGCTGTCCGATCGCC 3'                  |
| 2378KO-Dn-R_Sac                                                                         | 5' GATCGATCGAGTCTCTGTCAATGGTCCCCT 3'                     |
| 0896KO-Up-F                                                                             | 5' GATCGATCGGATCCCGCCAGTAACCGTACAGAT 3'                  |
| 0896KO-Up-R                                                                             | 5' GtttccacggtgtgctcACTAGTAGGGTCCGAAGAGCAGGAG 3'         |
| 0896KO-Dn-F                                                                             | 5' AaattgtcacaacgcgcGGTCTTTGCAGCAATGCT 3'                |
| 0896KO-Dn-R_Sac                                                                         | 5' GATCGATCGAGTCTGACCACCTAGCAAATGTTCC 3'                 |

Table S4. Sequence of TetR and LacI fluorescent fusion protein constructs

EB2072: *PkaiBC*::**RBS**::*tetR*::**ECFP** *PkaiBC*::**RBS**::**EYFP**::**linker**::**lacI** cloned between *NotI* and *SacI* of pAM1303. Note that the beginning of *PkaiBC* contains the *kaiA* terminator which will serve to decouple TetR and LacI expression.

GCGGCCGCTCTAGACGCAAAATTGCAATCTGCATTTGGGTGGAATCGACGGCAATTTTGCAGGATTGCCAGCGGGCGCTGTCCGCC  
 GATCGCTATCAACTCCAAGTCTGTGAGTCTGGCGAAATGCTCTTGGAGTATGCCAAACCCATCGTGACCAAAATCGACTGCCTGAT  
 TTTAGTGGCAGCCAATCCCAGCTTCAGGGCAGTTGTTTCAGCAGCTCTGCTTTGAGGGAGTGGTGGTACCAGCGATTGTCGTAGGGC  
 ATCGCGACAGTGAGGATCCCAGTGAACAGCCAAAGAACAGCTCTATCACAGCGTGAAGTGCACCTCGGTATCCATCAGCTCGA  
 GCAATTGCCCTACCAAGTTGATGCTGCATGGCTGAAATTTCTGCGCTTAGCCCCGGTTCGAGACCATGGCCGACCACATCATGCTGA  
 TGGGGGCAACCAGTATCCGAGCTACGAGCCAGCAGCGGGACCTCGCTCAGCGACTACAAGAGCGCTAGGCTATCTCGGG  
 TCTACTACAAGCGTGAATCCGATCGCTTTCTGCGCAACCTACCCGCTACGAAAGCAAAAAGCTGCACCAAGCGATCGACTAG  
 CTATCGTGAAATCGTTTTGAGCTATTTTTCGCCGAATAGCAACCTCAACCAGAGCATTGACAACCTTCGTCAACATGGCTTTCTTTGC  
 CGATGTTCCAGTACCAAAAGTGTAGAAAATTCACATGGAGCTGATGGACGAGTTTGCCAAGAAGCTCCGCGTAGAGGGACGTTCA  
 GAGGACATTTTGTGGATTATCGGTGACTTAAATTGATGTAATTCACATCTTTGTGAGATGTATCGACGGTCTATCCCACGAGA  
 AACCTGAAAAGGTAAGGAGGTTCTAAGCTCGGCTCAATTTCTCTCTTTATCCTGTTAGATGGTTGATTGCTGTTACCCCGTT  
 GATCTGCGTAGATCTTC**TAAGGAGGAAAAAA**ATGGTCTAGATTAGATAAAAAGTAAAGTGATTAACAGCGCATTAGAGCTGCTTAA  
 TGAGGTCCGAATCGAAGGTTTAAACAACCCGTAACCTCGCCAGAAGCTAGGTGTAGAGCAGCCTACATTGTATTGGCATGTA  
 AATAAGCGGGCTTTGCTCGACGCTTAGCCATTGAGATGTTAGATAGCCACCATACTACTTTTGCCCTTTAGAAAGGGGAAAGCTG  
 GCAAGATTTTTACGTAATAACCGTAAAAGTTTTAGATGTCTTACTAAGTCAATCGCATGGAGCAAAAAGTACATTTAGGTACAC  
 GGCTACAGAAAAACAGTATGAAACTCTCGAAAATCAATTAAGCTTTTATGCCAACAAGGTTTTCTACTAGAGAATGCATTATAT  
 GCCTCAGCGCTGTGGGCATTTTACTTTAGGTTGCGTATTGGAAGATCAAGAGCATCAAGTTCGCTAAAGAAGAAAGGGAAACAC  
 CTACTACTGATAGTATGCCGCAATTATTACGACAAGCTATCGAATATTTGATCACCAAGGTGCAGAGCCAGCCTTCTTATTCGGC  
 CTTGAATTGATCATATGCGGATTAGAAAAACAACCTAAATGTGAAAGTGGGTCT**ATGGT**GAGCAAGGGCGAGGAGCTGTT**ACCCG**  
**GGTGGTGCCCATCTGGT**CGAGCTGGACGGCGACGTAACCGCCACAAGTTCAGCGTGTCCGGCAGGGCGAGGGCGATGCCACCTACGGCAAGCTGACCCTGA  
 CCTACGGCAAGCTGACCCTGAAGTTCATCTGCACCACCGGCAAGCTGCCCGTCCCTGGCCACCCTCGTGACCACCTGACCTG  
 GGGCGTGCAGTGTTCAGCCGCTACCCCGACCACATGAAGCAGCAGACTTCTTCAAGTCCGCCATGCCGAAGGCTACGTCCAG  
 GAGCGCACCATCTTCTCAAGGACGACGGCAACTACAAGACCCGCGCGAGGTGAAGTTCGAGGGGACACCCTGGTGAACCCG  
 ATCGAGCTGAAGGGCATCGACTTCAAGGAGGACGGCAACATCTGGGGCACAAGCTGGAGTACAACACTACATCAGCCACAACGTC  
 TATATCACCGCCGACAAGCAGAAGAACCGGCATCAAGGCCAACCTCAAGATCCGCCACAACATCGAGGACGGCAGCGTGCAGCTC  
 GCCGACCACTACCAGCAGAACACCCCCATCGGCGACGGCCCCGCTGCTGCTGCCGACAACCACTACCTGAGCACCCAGTCCGCC  
 TGAGCAAAGACCCCAACGAGAAGCGCGATC**ACATGGTCTGCTGGAGTTCGTG**ACCGCCCGGGATCACTCTCGGCATGGAGC  
**AGCTGTACAAGTAA**CGCAAAATTGCAATCTGCATTTGGGTGGAATCGACGGCAATTTTGCAGGATTGCCAGCGGGCGCTGTCCGCC  
 GATCGCTATCAACTCCAAGTCTGTGAGTCTGGCGAAATGCTCTTGGAGTATGCCAAACCCATCGTGACCAAAATCGACTGCCTGAT  
 TTTAGTGGCAGCCAATCCCAGCTTCAGGGCAGTTGTTTCAGCAGCTCTGCTTTGAGGGAGTGGTGGTACCAGCGATTGTCGTAGGGC  
 ATCGCGACAGTGAGGATCCCAGTGAACAGCCAAAGAACAGCTCTATCACAGCGTGAAGTGCACCTCGGTATCCATCAGCTCGA  
 GCAATTGCCCTACCAAGTTGATGCTGCATGGCTGAAATTTCTGCGCTTAGCCCCGGTTCGAGACCATGGCCGACCACATCATGCTGA  
 TGGGGGCAACCAGTATCCGAGCTACGAGCCAGCAGCGGGACCTCGCTCAGCGACTACAAGAGCGCTAGGCTATCTCGGG  
 TCTACTACAAGCGTGAATCCGATCGCTTTCTGCGCAACCTACCCGCTACGAAAGCAAAAAGCTGCACCAAGCGATCGACTAG  
 CTATCGTGAAATCGTTTTGAGCTATTTTTCGCCGAATAGCAACCTCAACCAGAGCATTGACAACCTTCGTCAACATGGCTTTCTTTGC  
 CGATGTTCCAGTACCAAAAGTGTAGAAAATTCACATGGAGCTGATGGACGAGTTTGCCAAGAAGCTCCGCGTAGAGGGACGTTCA  
 GAGGACATTTTGTGGATTATCGGTGACTTAAATTGATGTAATTCACATCTTTGTGAGATGTATCGACGGTCTATCCCACGAGA  
 AACCTGAAAAGGTAAGGAGGTTCTAAGCTCGGCTCAATTTCTCTCTTTATCCTGTTAGATGGTTGATTGCTGTTACCCCGTT  
 GATCTGCGTAGATCTTC**TAAGGAGGAAAAAA**ATGGTCTAGATTAGATAAAAAGTAAAGTGATTAACAGCGCATTAGAGCTGCTTAA  
 AGCTGGACGGCGACGTAACCGCCACAAGTTCAGCGTGTCCGGCAGGGCGAGGGCGATGCCACCTACGGCAAGCTGACCCTGA  
 AGTTTATCTGCACCACCGGCAAGCTGCCCGTGCCTGGCCACCCTCGTGACCACCTTCGGCTACGGCCTGCAGTGTTCGCCCGC  
 TACCCCGACCACATGAAGCAGCAGACTTCTTCAAGTCCGCCATGCCGAAGGCTACGTCCAGGAGCGCACCATTTCTTCAAGG  
 ACGACGGCAACTACAAGACCCCGCGAGGTGAAGTTCGAGGGGACACCCTGGTGAACCGCATCGAGCTGAAGGGCAGTCCGACT  
 TCAAGGAGGACGGCAACATCTGGGGCACAAGCTGGAGTACAACACTACAACAGCCACAACGTCTATATCATGGCCGACAAGCAGA  
 AGAACGGCATCAAGTGAACCTCAAGATCCGCCACAACATCGAGGACGGCAGCGTGCAGCTCGCCGACCCTACCAGCAGAACA  
 CCCCCATCGGCGACGGCCCCGTGCTGCTGCCGACAACCACTACCTGAGTACCAGTCCGCCCTGAGCAAAGACCCCAACGAGAA  
 GCGCGATCACATGGTCTGGAGTTCGTGACCCCGGGATCACTCTCGGCATGGACCGAGCTGTACAAG**CTGCAAGCCCGG**  
**GGATCC**GTGGTGAATGTGAAACCAGTAACGTTATACGATGTGCGAGAGTATGCCGGTGTCTTTATCAGACCGTTTCCCGCGTGGT  
 GAACAGGCCAGCCAGCTTTCTGCGAAAACCGCGGAAAAAGTGAAGCGGGCGATGGCGGAGCTGAATTACATTTCCAACCCGCT  
 GGCACAACAACTGGCGGCAAAACAGTCTGTGATGGCGTGGCCACTCCAGTCTGGCCCTGCACGCGCCGCTCGAAAATGTCT  
 GCGGACTAAATCTCGCCGATCAACTGGGTGCCAGCGTGGTGGTTCGATGGTGAAGCAAGCGGGCGTCAAGGCTGATAAA  
 GCGGCGGTGCACAATCTTCTCGCGCAACCGCTCAGTGGGCTGATCATAACTATCCGCTGGATGACCAGGATGCCATTGTGTGG  
 AAGCTGCCTGCACTAATGTTCCGGCGTTATTTCTTGTGATGCTCTGACCAGACCCATCAACAGTATTATTTCTCCATGAAGACG  
 GTACCGCATGGCGTGGAGCATCTGGTGCATTGGGTCAACCAGCAAATCGCGCTGTTAGCGGGCCATAAGTCTGTCTCGG  
 CGCTCTCGCTCTGGCTGGCATAAAATCTCACTCGCAATCAAATTCAGCCGATAGCGGAACGGGAAGGGCAGTGGAGTGGC  
 ATGTCCGGTTTTCAACAAACCATGCAAAATGCTGAATGAGGGCATCGTTCACACTGCGATGCTGGTTGCAACGATCAGATGGCGC  
 TGGGCGCAATGCGCGCATTACCGAGTCCGGGCTGCGCGTGGTGGGATATCTCGGTAGTGGGATACGACGATACCGAAGACAG  
 CTATGTTATATCCCGCGTTAACCACCATCAACAGGATTTTCGCTGCTGGGGCAAACAGCGTGGACCGCTTGTGCAACTCT  
 CTCAGGGCCAGGCGGTGAAGGGCAATCAGCTGTTGCCGCTCTCACTGGTGA AAAAGAAAAACCACCTGGCGCCAAATACGCAAA  
 CCGCCTCTCCCGCGCGTTGGCCGATTCAATTAATGCAGCTGTGA**GAGCTC**



Table S4. Cont.

EB2073: *PkaiBC*::*RB3*::*tetR*::*linker*::*EYFP* cloned between *NotI* and *SacI* of pAM1303

```
GCGGCCGCTCTAGACGCAAATTGCAATCTGCATTTGGGTGGAATCGACGGCAATTTGCAGGATTGCCAGCGGGCGTGTCCGGCC
GATCGCTATCAACTCCAAGTCTGTGAGTCTGGCGAAATGCTCTTGGAGTATGCCCAAACCCATCGTGACCAAATCGACTGCCTGAT
TTTAGTGGCAGCCAATCCCAGCTCAGGGCAGTTGTTACAGCAGCTCTGCTTTGAGGGAGTGGTGGTACCAGCGATTGTCGTAGGCG
ATCGCGACAGTGAGGATCCCAGTGAACCAGCCAAAGAACAGCTCTATCACAGCGCTGAACTGCACCTCGGTATCCATCAGCTCGA
GCAATTGCCCTACCAAGTTGATGCTGCACTGGCTGAATTTCTGCGCTTAGCCCCGGTGCAGACCATGGCCGACCACATCATGCTGA
TGGGGGCCAACACGATCCCAGCTATCGAGCCAGCAGCGGGACCTCGCTCAGCGACTACAAGAGCGCCTAGGCTATCTCGGGG
TCTACTACAAGCGTGATCCCAGTCGCTTTCTGCGCAACCTACCCGCTACGAAAGCCAAAAGCTGCACCAAGCGATGCAGACTAG
CTATCGTGAAATCGTTTTGAGCTATTTTCGCCGAATAGCAACCTCAACCAGAGCATTGACAACCTCGTCAACATGGCTTTCTTTCG
CGATGTTCCAGTACCAAAGTGGTAGAAAATTCACATGGAGCTGATGGACGAGTTTGC AAGAAGCTCCGCGTAGAGGGACGTTCA
GAGGACATTTTGTGGATTATCGGCTGACTTTAATTGATGTAATTGCACATCTTGTGAGATGTATCGACGGTCTATCCCACGAGA
AACCTGAAAAGGTAAGGAGGTCTTAAGCTCGGCTCAATTTCTCTTTATCTGTTAGATGGTTTGATTGCTGTTGCTACCCCGTT
GATCTGCGTAGATCTTCTAAGGAGGAAAAAAATGTCTAGATTAGATAAAAGTAAAGTGATTAACAGCGCATTAGAGCTGCTTAA
TGAGGTGCGAATCGAAGGTTTAAACAACCCGTAAGCTCGCCAGAAAGCTAGGTGTAGAGCAGCCTACATTGTATTGGCATGTA AAA
AATAAGCGGGCTTTGCTCGACGCCTTAGCCATTGAGATGTTAGATAGGCACCATACTCACTTTTGGCCTTTAGAAGGGGAAAGCTG
GCAAGATTTTTTACGTAATAACGCTAAAAAGTTTTAGATGTGCTTTACTAAGTCATCGCGATGGAGCAAAAGTACATTTAGGTACAC
GGCCTACAGAAAAACAGTATGAAACTCTCGAAAATCAATTAGCCTTTTTATGCCAACAAGGTTTTTCACTAGAGAATGCATTATAT
GCACTCAGCGCTGTGGGGCATTCTTTAGGTTGCGTATTGGAAGATCAAGAGCATCAAGTCGCTAAAAGAAGAAAGGGAAACAC
CTACTACTGATAGTATGCCGCCATTATTACGACAAGCTATCGAATTATTTGATCACC AAGGTGCAGAGCCAGCCTTCTATTCCGGC
CTGAATTGATCATATGCGGATTAGAAAAACAACCTTAAATGTGAAAAGTGGGTCTGACATCTCGAGTTGGTGAGCAAGGGCGAGG
AGCTGTTACCGGGGTGGTGCCATCCTGGTTCGAGCTGGACGGCGACGTAACGGCCACAAGTTCAGCGTGTCCGGCGAGGGCG
AGGGCGATGCCACCTACGGCAAGCTGACCCTGAAGTTCATCTGCACCACCGGCAAGCTGCCCGTGCCCTGGCCACCTCGTGAC
CACCTTCGGCTACGGCCTGCAGTGCTTCGCCCGTACCCCGACCACATGAAGCAGCAGCACTTCTCAAGTCCGCCATGCCCGAA
GGCTACGTCCAGGAGCGCACCATCTTCTTCAAGGACGACGGCAACTACAAGACCCGCGCCGAGGTGAAGTTCGAGGGCGACACC
CTGGTGAACCCGATCGAGCTGAAGGGCATCAACTTCAAGGAGGACGGCAACATCCTGGGGCACAAGCTGGAGTACA ACTACAAC
AGCCACAACGTCTATATCATGGCCGACAAGCAGAAGAACGGCATCAAGGTGAACTTCAAGATCCGCCACAACATCGAGGGCGGC
AGCGTGACGCTCGCCGACCACTACCAGCAGAACACCCCATCGGCGACGGCCCGTGCTGCTGCCCGACAACCACTACCTGAGCT
ACCAGTCCGCCCTGAGCAAAAGACCCCAACGAGAAGCGGATCACATGGTCTGCTGGAGTTCGTGACCCGCCCGGGGATCACTCT
CGGCATGGACGAGCTGTACAAGTAAGAGCTC
```

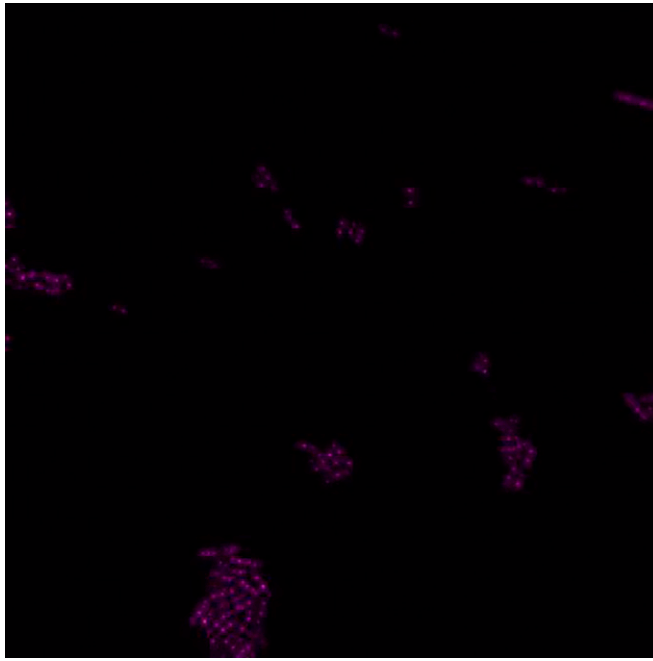

**Movie S1.** Time-lapse movies of wild-type cells with labeled chromosomes (TetR-EYFP). Individual frames are separated by 1 h. A single z-plane is shown.

[Movie S1](#)

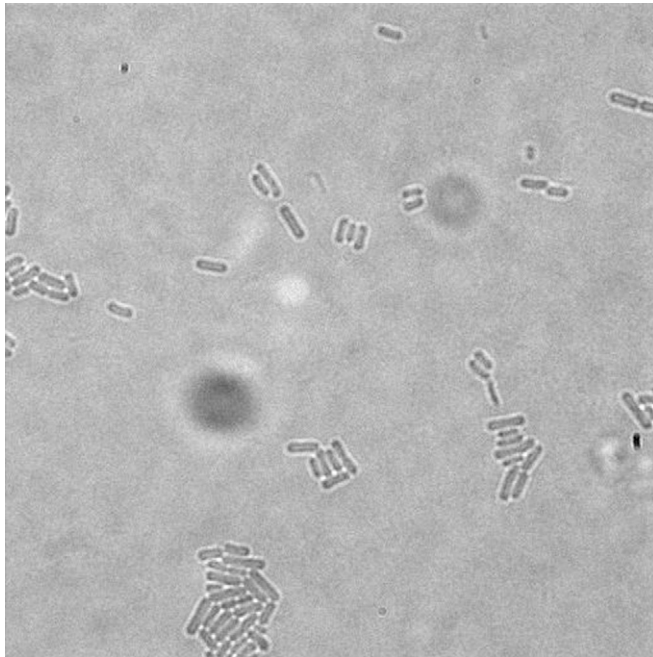

**Movie S2.** Corresponding DIC images for [Movie S1](#).

[Movie S2](#)

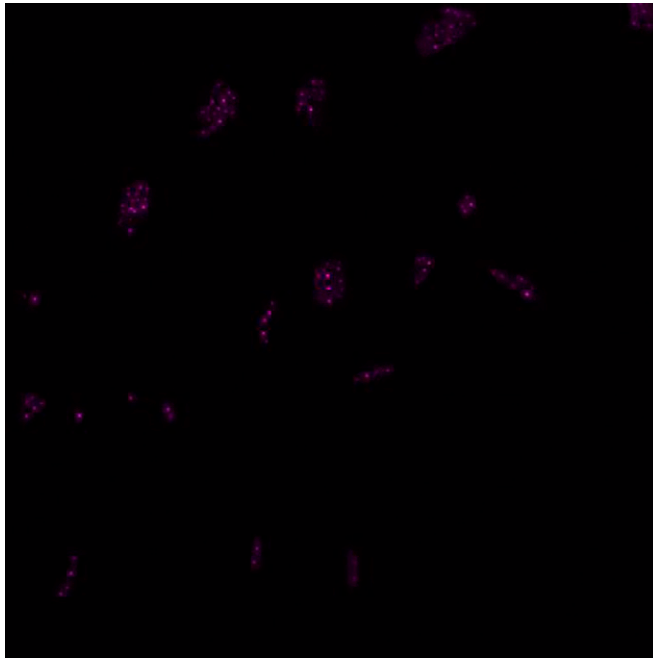

**Movie S3.** Time-lapse movies of  $\Delta minD$  cells with labeled chromosomes (TetR-EYFP). Individual frames are separated by 1 h. A single z-plane is shown.

[Movie S3](#)

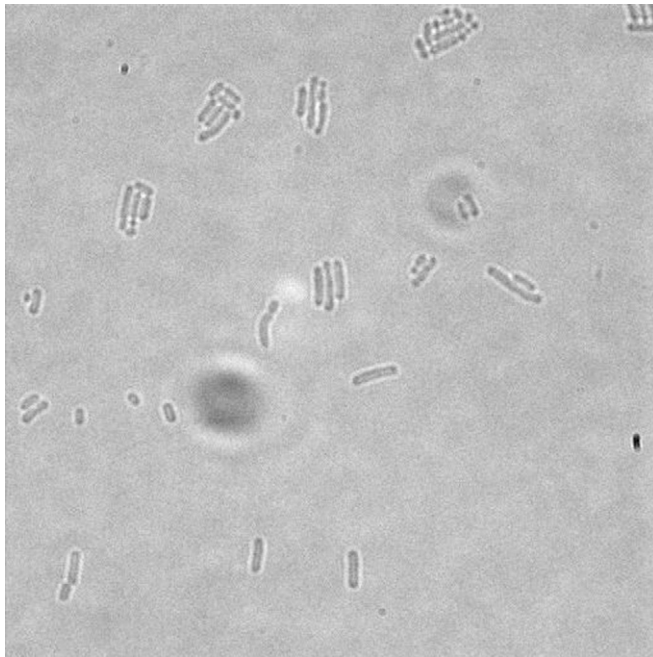

**Movie S4.** Corresponding DIC images for [Movie S3](#).

[Movie S4](#)
